# Supplementary material
Source: PubMed Central journal article supplement (PMC3541521)
Supplement: NIHMS49039-supplement-01.pdf [file NIHMS49039-supplement-01.pdf]

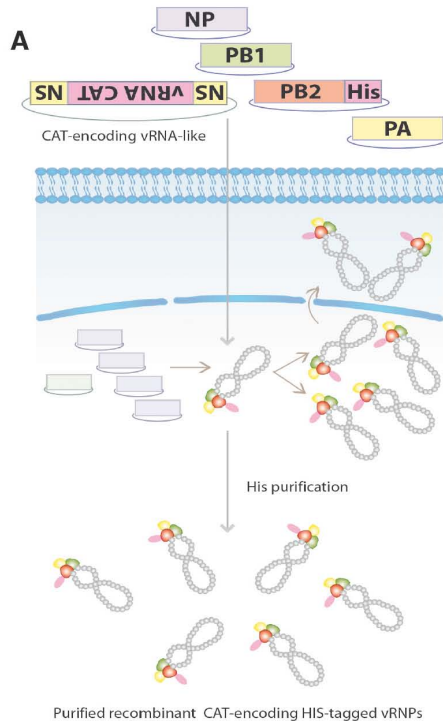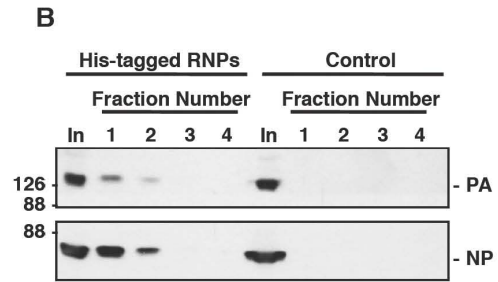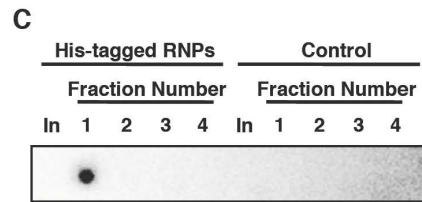

**Supp. Inf. 1**

**In vivo reconstitution of viral RNPs.** (A); HEK293T cells were transfected with plasmids expressing PA, PB1, PB2-His or untagged PB2 as control and NP. In addition, they were transfected with plasmid that expresses a vRNA-like CAT gene under the control of the RNA polymerase I promoter and containing the 3' and 5' UTRs of NS segment. (B); The reconstituted vRNPs were purified by <sup>25</sup>Ni-NTA-agarose resin and the presence of PA and NP evaluated by Western blots. (C); Evaluation of the *in vitro* transcription activity of the purified RNPs. The activity was assayed by measuring the incorporation of labeled GTP in the presence of ApG.

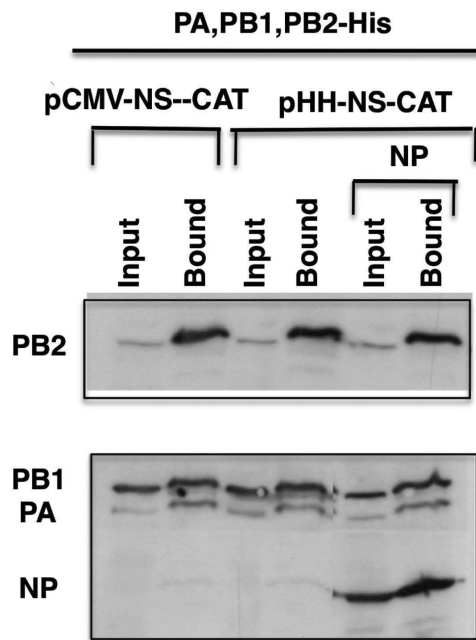

### Supp. Inf. 2

**In vivo reconstitution of viral polymerase complexes.** HEK293T cells were transfected with plasmids expressing PA, PB1, PB2-His and NP when indicated and transfected with a plasmid expressing under an RNA polymerase II promoter, the CAT gene with the 5' and 3' UTR sequences of the NS segment of viral mRNA (pCMV-NS-CAT), or with a plasmid expressing the CAT gene in antisense orientation that contains the same 3' and 5' UTRs (pHH-NS-CAT). The reconstituted polymerase complexes were purified by <sup>2+</sup>Ni-NTA-agarose resins and the presence of PB2, PA, PB1 and NP evaluated by Western blots in the input and the retained fraction (bound).
